# Supplementary material
Source: PubMed Central journal article supplement (PMC10992564)
Supplement: 262_2021_3101_MOESM1_ESM.pdf [file 262_2021_3101_MOESM1_ESM.pdf]

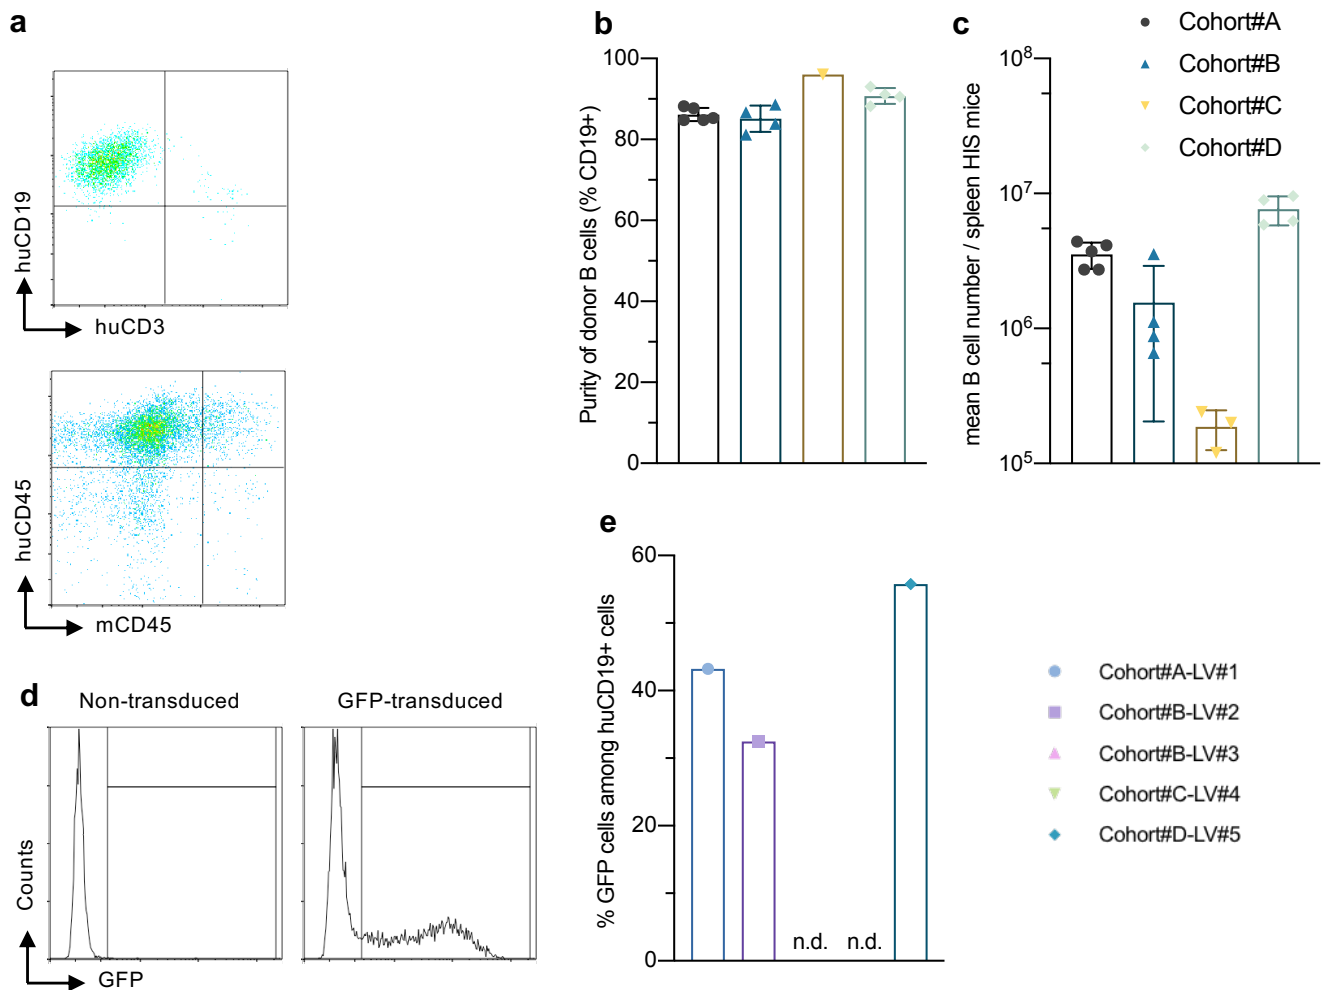

**Sup Figure 1. Phenotypical characterization of donor B cells before adoptive transfer.** Four cohorts of NSG mice were humanized with 4 different batches of huCD34<sup>+</sup> cells. B cells were isolated from 8 to 16 donor mice depending on the cohort. B cells were isolated from pooled donor-matched splenocytes and transduced with GFP-encoding lentiviral vectors (LV) before adoptive transfer into recipient mice. **(a)** B cell purity after magnetic huCD19 positive selection of donor splenocytes as assessed by flow cytometry. Representative plots are presented. **(b)** Purity of isolated donor B cells for each cohort. **(c)** Absolute numbers of B cells retrieved from a single donor HIS mice after magnetic hu CD19 positive selection for each cohort. **(d)** Transduction efficiency. For some experiments, a small fraction of transduced B cells were kept in culture for 3 days to assess transduction efficiency by flow cytometry. Representative plots of GFP expression are presented (within the CD19<sup>+</sup> gate). **(e)** Transduction efficiency evaluated as the percentage of GFP<sup>+</sup> B cells (n.d., not done). Cohort#A: pool of 16 donor mice; Cohort#B: pool of 8 donor mice, Cohort#C: pool of 15 donor mice, Cohort#D: pool of 15 donor mice.

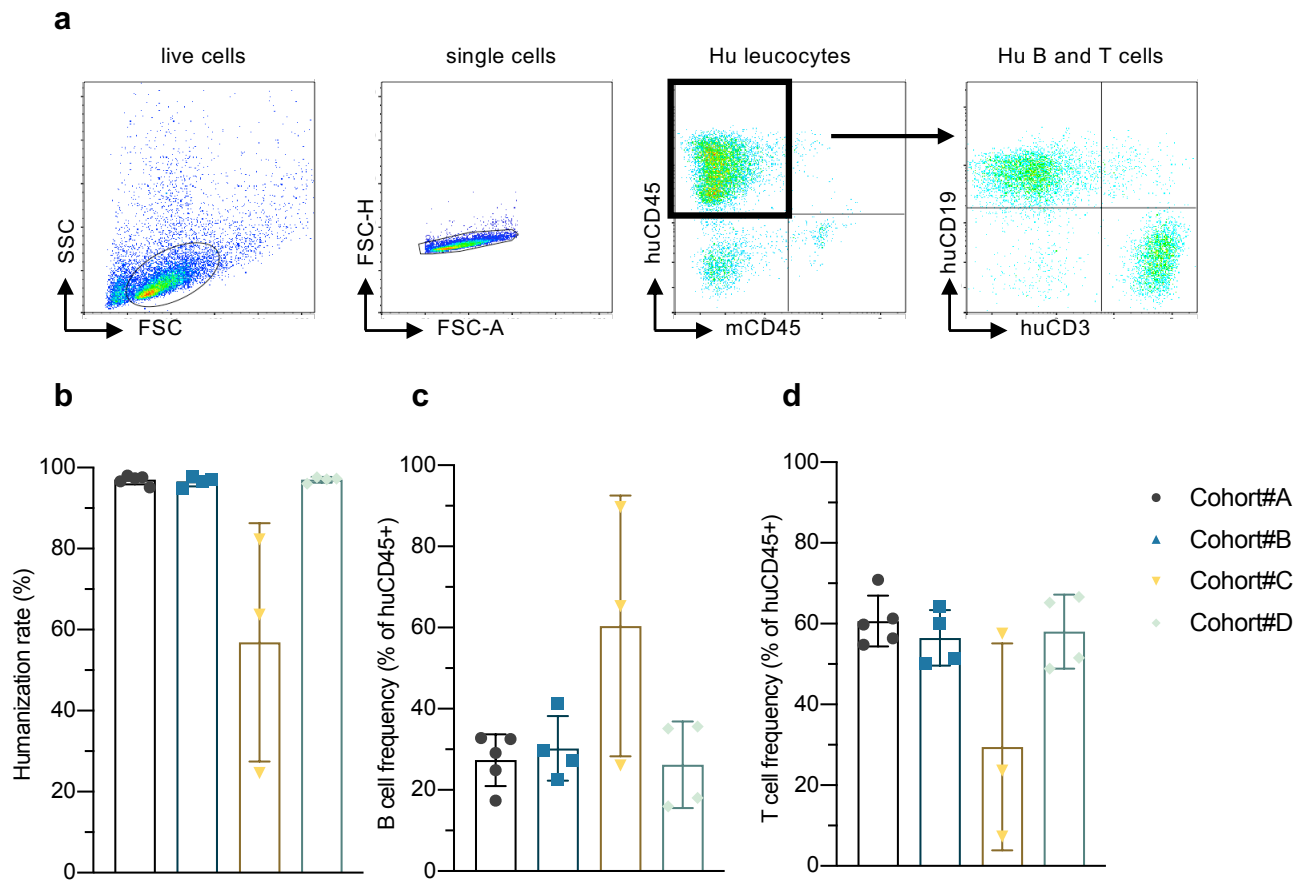

**Sup Figure 2. Generation of Humanized Immune System mice.** Four cohorts of NSG mice were humanized with 4 different batches of huCD34<sup>+</sup> cells. For adoptive transfer, donor B cells were isolated by CD19<sup>+</sup> positive selection from a pool of matched donor splenocytes. **(a)** Gating strategy for analysis of human leucocytes. Representative plots are presented. **(b)** Humanization “rate” calculated as the huCD45<sup>+</sup>/(huCD45<sup>+</sup> + mCD45<sup>+</sup>) cell ratios. **(c)** and **(d)** Frequencies of human B (CD20<sup>+</sup>) and T cells (CD3<sup>+</sup>), respectively, among huCD45<sup>+</sup> splenocytes in donor HIS-mice spleen analyzed by flow cytometry. Cohort#A: pool of 16 donor mice; Cohort#B: pool of 8 donor mice, Cohort#C: pool of 15 donor mice, Cohort#D: pool of 15 donor mice.

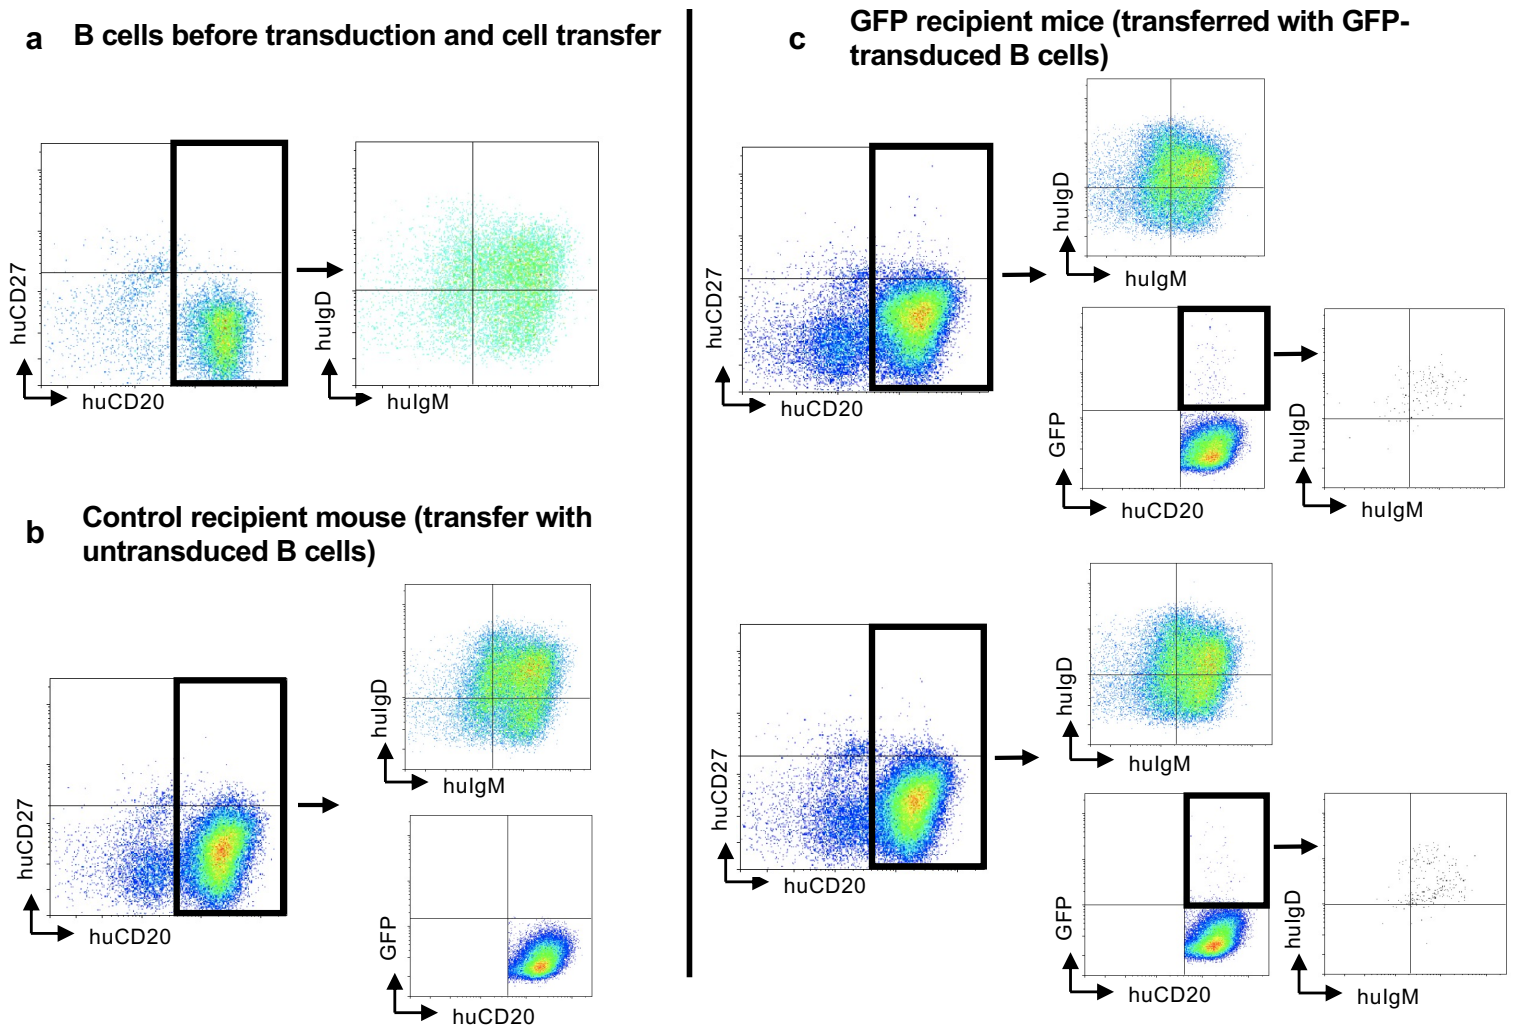

**Sup Figure 3. Phenotype of human B cells before and after adoptive transfer.** NSG mice were humanized with huCD34<sup>+</sup> cells. B cells were isolated from donor mice and transduced (or not) with GFP-encoding lentiviral vectors before adoptive transfer in recipient mice. B cell phenotype (CD20, CD27, IgM, IgD) was assessed by flow cytometry before transduction (**a**) and in the spleen of recipient mice (recipient mice were inoculated with non-transduced B cells (**b**) or GFP-transduced B cells (two replicates are showed to show the reproducibility of the data) (**c**)).

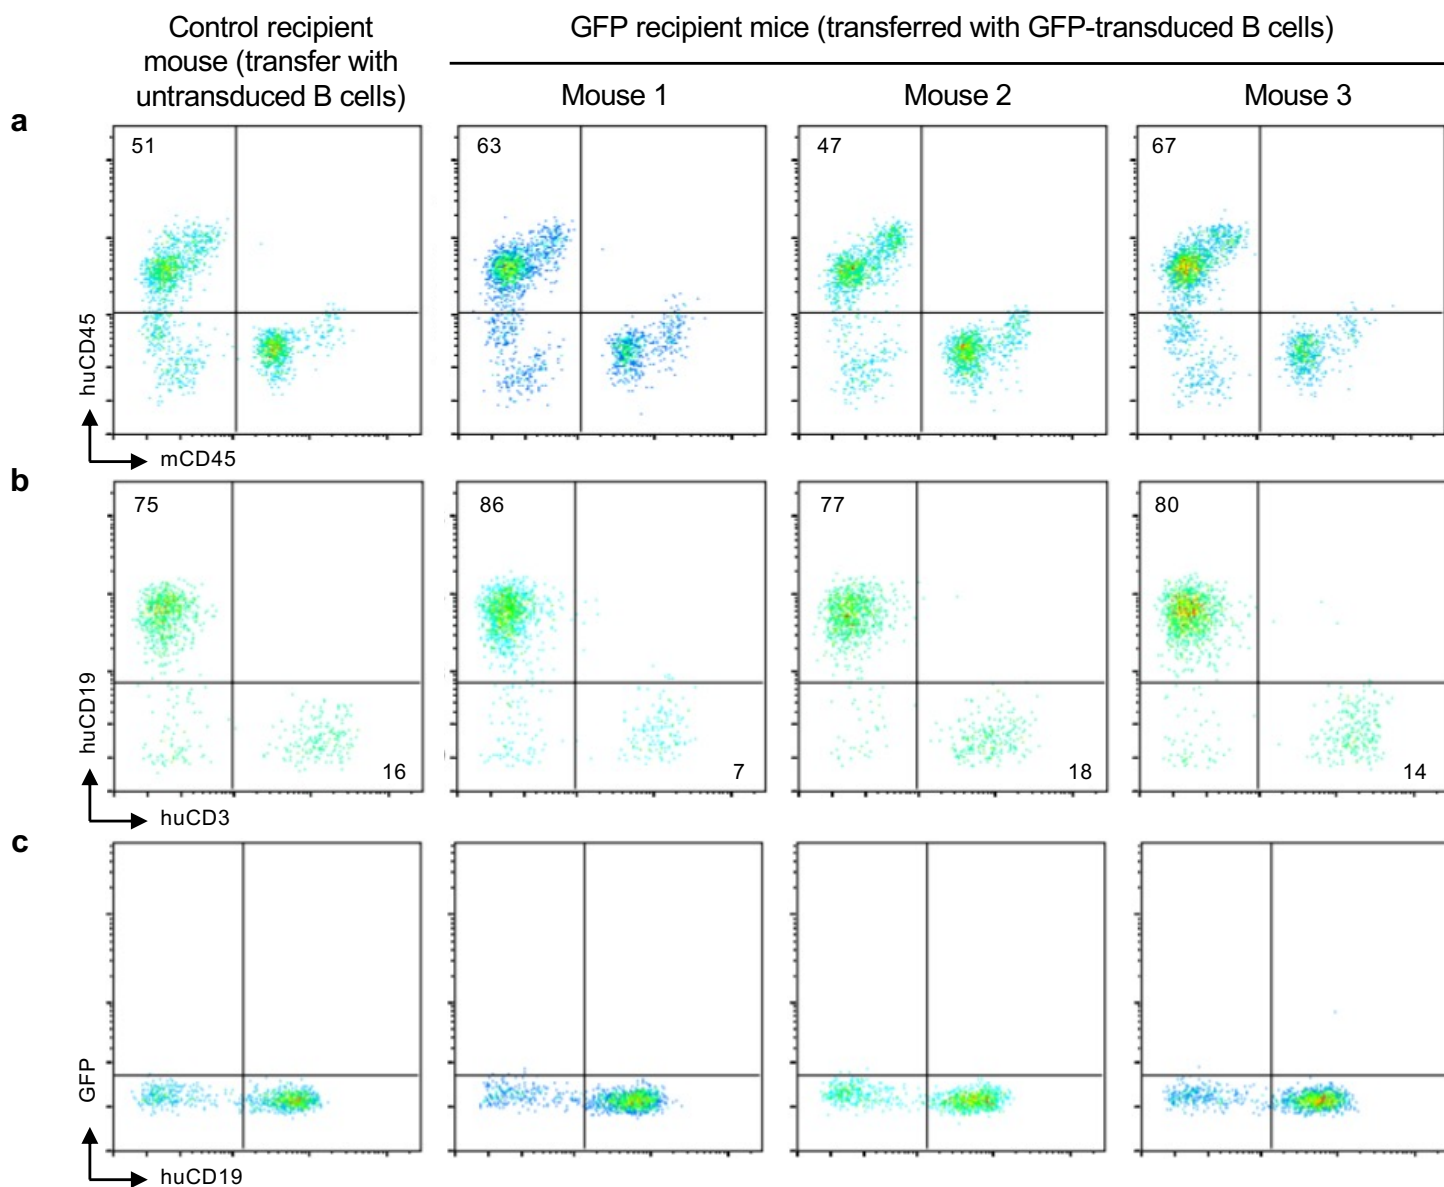

**Sup Figure 4. Analysis of the peripheral “human” hematopoietic compartment of HIS recipients after adoptive transfer of GFP-transduced B cells.** B cells were isolated from HIS donor mice and transferred into autologous HIS recipients after lentiviral vector transduction with a GFP transgene. In the control group, non-transduced B cells were transferred to autologous HIS recipients. **(a)** Frequencies of huCD45<sup>+</sup> cells in recipient HIS-mice blood analyzed by flow cytometry 7 days after B cell transfer. **(b)** Frequencies of B (CD19<sup>+</sup>CD3<sup>-</sup>) and T (CD19<sup>-</sup>CD3<sup>+</sup>) cells among circulating huCD45<sup>+</sup> cells (huCD45<sup>+</sup>mCD45<sup>-</sup> gate) in recipient HIS-mice 7 days after B cell transfer **(c)** Pattern of GFP expression in circulating human leucocytes (huCD45<sup>+</sup>mCD45<sup>-</sup> gate) from recipient HIS-mice 7 days after B cell transfer.
